# Supplementary material for: Diphosphonate cavitands as molecular cups forl-lactic acid
Source: Royal Society of Chemistry journal article supplement (doi:10.1039/c6ce00270f), 2016-01-01
Supplement: c6ce00270f1.pdf [file c6ce00270f1.pdf]

## Electronic Supplementary Information for:

### Di-phosphonate cavitands as molecular cups for L-lactic acid

*T. Barboza, R. Pinalli, C. Massera and E. Dalcanale\**

Dipartimento di Chimica and INSTM, Udr Parma, Università di Parma,  
Parco Area delle Scienze 17/A, 43124 Parma, Italy. Email: [enrico.dalcanale@unipr.it](mailto:enrico.dalcanale@unipr.it)

|                                                                                                                                                                                                                        |          |
|------------------------------------------------------------------------------------------------------------------------------------------------------------------------------------------------------------------------|----------|
| <b>Figure S1.</b> $^1\text{H}$ NMR spectrum of ABii[C <sub>3</sub> H <sub>7</sub> , CH <sub>3</sub> , Ph]                                                                                                              | Page S2  |
| <b>Figure S2.</b> $^{31}\text{P}$ NMR spectrum of ABii[C <sub>3</sub> H <sub>7</sub> , CH <sub>3</sub> , Ph]                                                                                                           | Page S2  |
| <b>Figure S3.</b> $^1\text{H}$ NMR spectrum of ACii[C <sub>3</sub> H <sub>7</sub> , CH <sub>3</sub> , Ph]                                                                                                              | Page S3  |
| <b>Figure S4.</b> $^{31}\text{P}$ NMR spectrum of ACii[C <sub>3</sub> H <sub>7</sub> , CH <sub>3</sub> , Ph]                                                                                                           | Page S3  |
| <b>Figure S5.</b> $^{31}\text{P}$ NMR titration of ABii[C <sub>3</sub> H <sub>7</sub> , CH <sub>3</sub> , Ph]                                                                                                          | Page S4  |
| <b>Figure S6.</b> $^{31}\text{P}$ NMR titration of ACii[C <sub>3</sub> H <sub>7</sub> , CH <sub>3</sub> , Ph]                                                                                                          | Page S4  |
| <b>Figure S7.</b> $^1\text{H}$ NMR titration of ABii[C <sub>3</sub> H <sub>7</sub> , CH <sub>3</sub> , Ph]                                                                                                             | Page S5  |
| <b>Figure S8.</b> $^1\text{H}$ NMR titration of ACii[C <sub>3</sub> H <sub>7</sub> , CH <sub>3</sub> , Ph]                                                                                                             | Page S5  |
| <b>Figure S9.</b> $^{31}\text{P}$ NMR competitive titration (ABii vs ACii with LLA)                                                                                                                                    | Page S6  |
| <b>Figure S10.</b> $^{31}\text{P}$ NMR spectrum of the ABii/ACii mixture at 1:1 ratio                                                                                                                                  | Page S6  |
| <b>Figure S11.</b> $^{31}\text{P}$ NMR competitive guests titration LLA vs EtOH with ACii as host.                                                                                                                     | Page S7  |
| <b>Figure S12.</b> $^1\text{H}$ NMR spectrum of commercial L-lactic acid                                                                                                                                               | Page S7  |
| <b>Figure S13.</b> Ortep view of ABii[C <sub>3</sub> H <sub>7</sub> , CH <sub>3</sub> , Ph]•C <sub>3</sub> H <sub>6</sub> O <sub>6</sub> •C <sub>3</sub> H <sub>6</sub> O <sub>6</sub> •C <sub>6</sub> H <sub>14</sub> | Page S8  |
| <b>Figure S14.</b> Ortep view of ACii[C <sub>3</sub> H <sub>7</sub> , CH <sub>3</sub> , Ph]•C <sub>3</sub> H <sub>6</sub> O <sub>6</sub>                                                                               | Page S9  |
| <b>Figure S15.</b> Space and filling view of the two complexes                                                                                                                                                         | Page S10 |
| <b>Table S1.</b> $^{31}\text{P}$ NMR titrations data for the determination of binding constants                                                                                                                        | Page S11 |
| <b>Figure S16.</b> Fitting curves of $^{31}\text{P}$ NMR titrations for ABii and ACii.                                                                                                                                 | Page S12 |

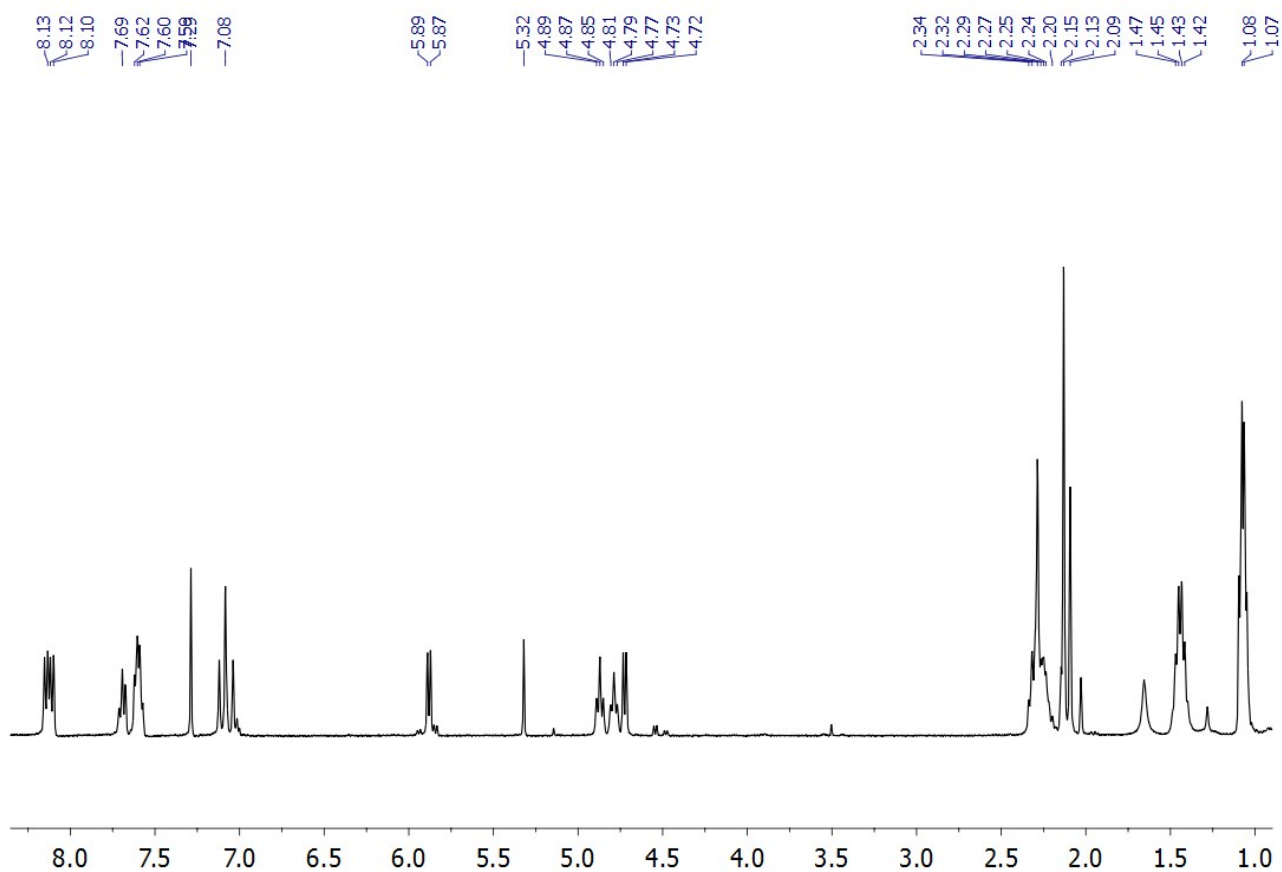

**Figure S1.**  $^1\text{H}$  NMR spectrum of  $\text{ABii}[\text{C}_3\text{H}_7, \text{CH}_3, \text{Ph}]$  ( $\text{CDCl}_3$ , 400 MHz, 298K).

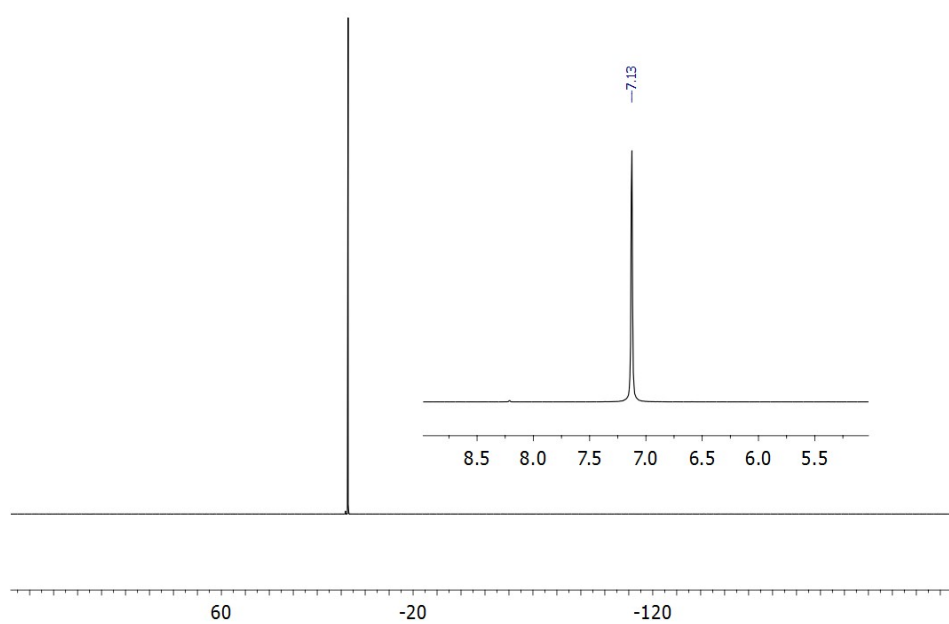

**Figure S2.**  $^{31}\text{P}$  NMR spectrum of  $\text{ABii}[\text{C}_3\text{H}_7, \text{CH}_3, \text{Ph}]$  ( $\text{CDCl}_3$ , 162 MHz, 298K).

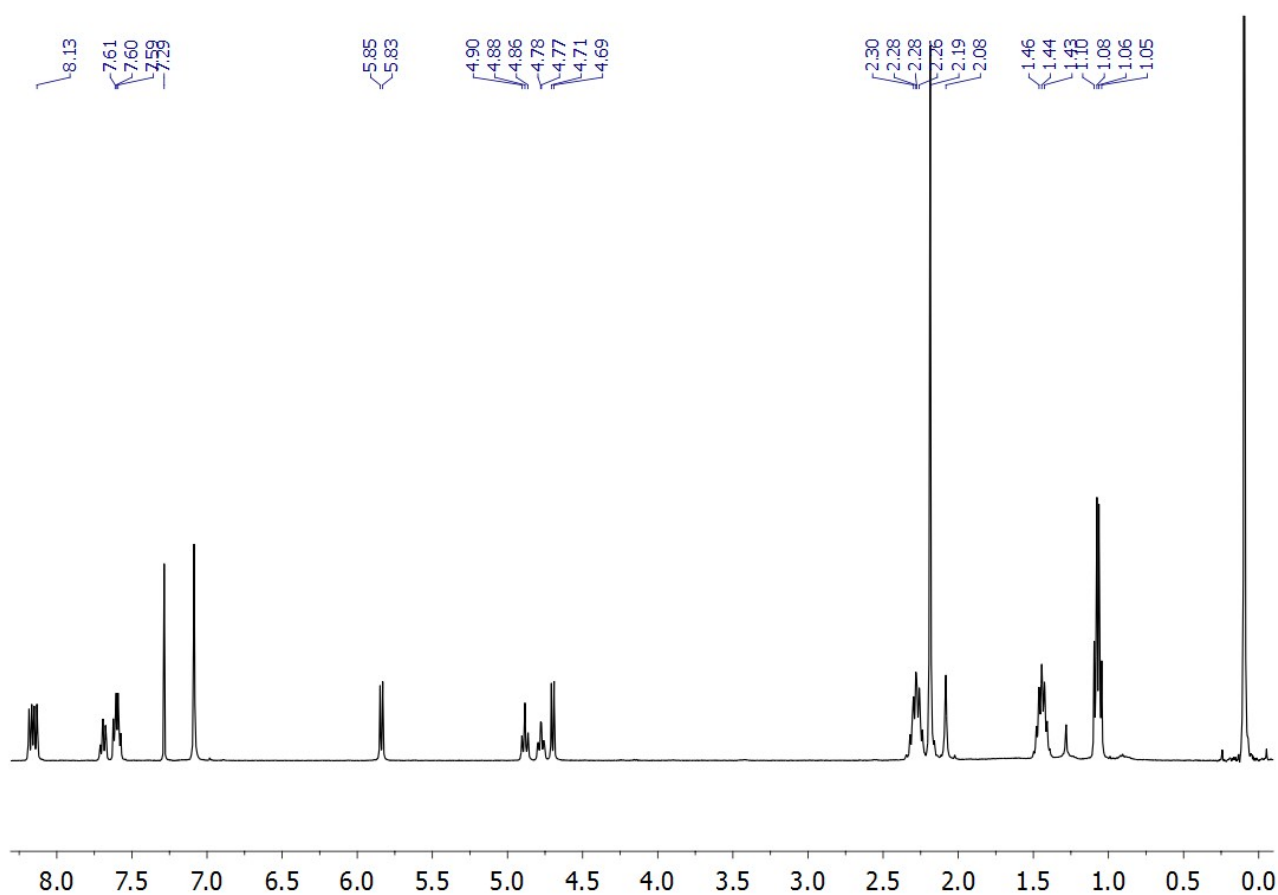

**Figure S3.**  $^1\text{H}$  NMR spectrum of  $\text{ACii}[\text{C}_3\text{H}_7, \text{CH}_3, \text{Ph}]$  ( $\text{CDCl}_3$ , 400 MHz, 298K).

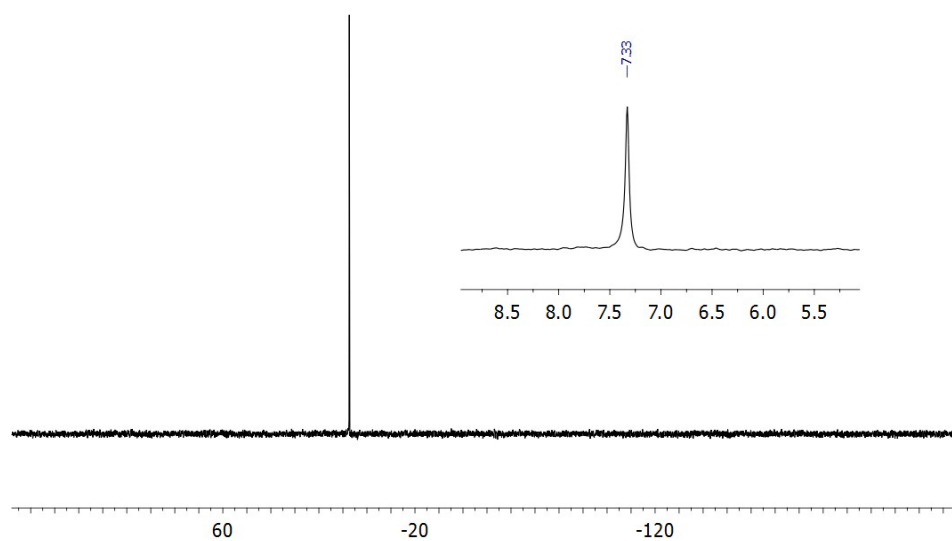

**Figure S4.**  $^{31}\text{P}$  NMR spectrum of  $\text{ACii}[\text{C}_3\text{H}_7, \text{CH}_3, \text{Ph}]$  ( $\text{CDCl}_3$ , 162 MHz, 298K).

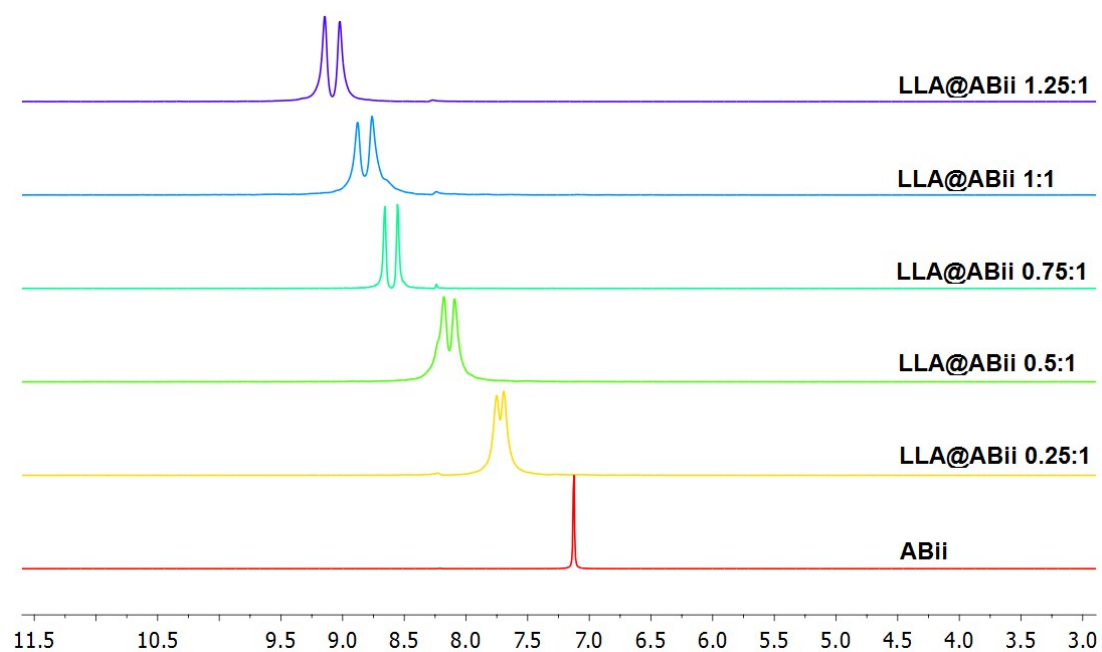

**Figure S5.**  $^{31}\text{P}$  NMR titration of ABii[ $\text{C}_3\text{H}_7$ ,  $\text{CH}_3$ , Ph] ( $\text{CDCl}_3$ , 162 MHz) with LLA.

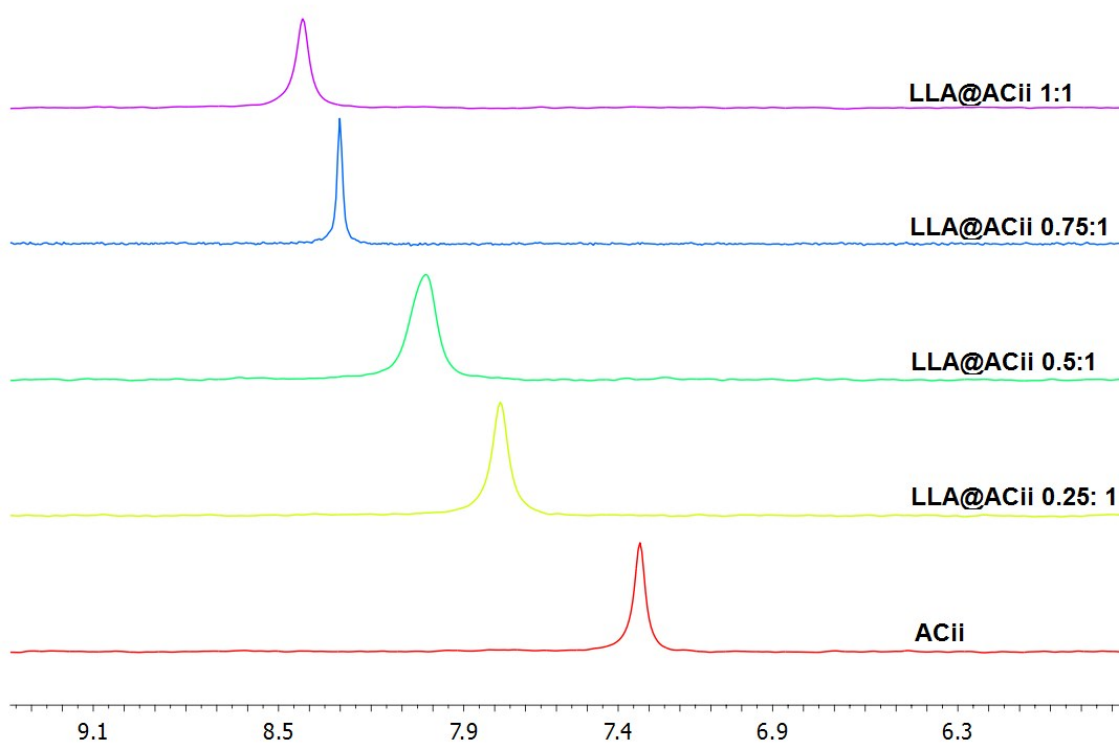

**Figure S6.**  $^{31}\text{P}$  NMR titration of ACii[ $\text{C}_3\text{H}_7$ ,  $\text{CH}_3$ , Ph] ( $\text{CDCl}_3$ , 162 MHz, 298K) with LLA.

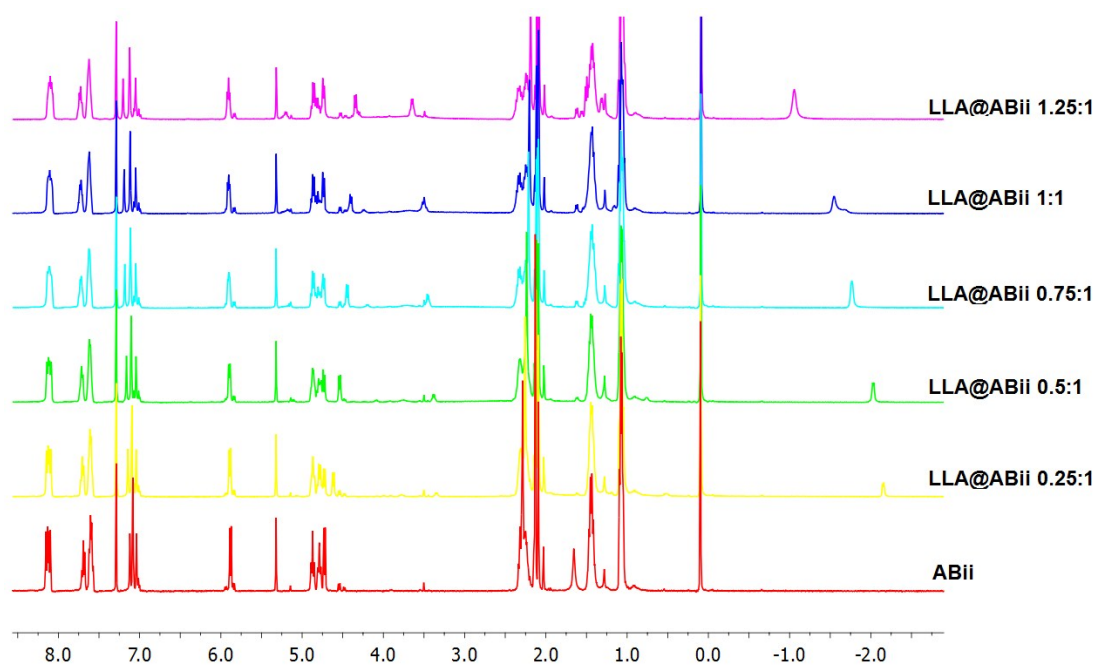

**Figure S7.**  $^1\text{H}$  NMR titration of  $\text{ABii}[\text{C}_3\text{H}_7, \text{CH}_3, \text{Ph}]$  ( $\text{CDCl}_3$ , 400 MHz) with LLA.

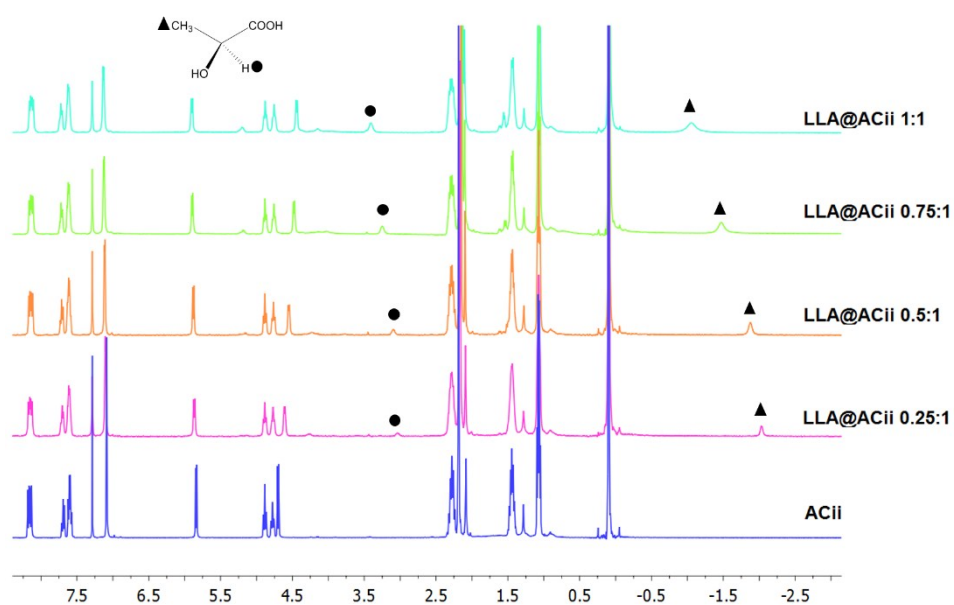

**Figure S8.**  $^1\text{H}$  NMR titration of  $\text{ACii}[\text{C}_3\text{H}_7, \text{CH}_3, \text{Ph}]$  ( $\text{CDCl}_3$ , 400 MHz, 298K) with LLA.

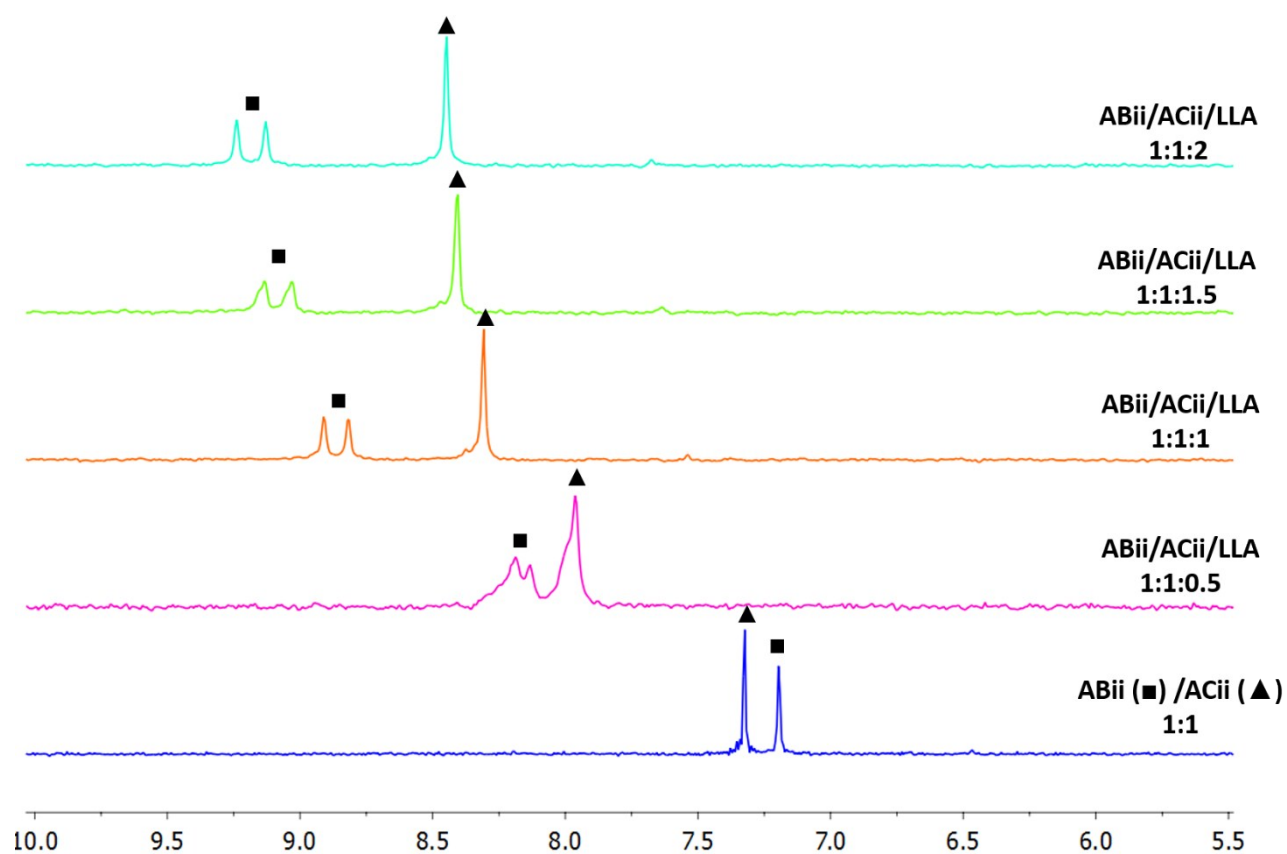

**Figure S9.**  $^{31}\text{P}$  NMR competition titration (**ABii** vs **ACii** as hosts, **LLA** as guest).

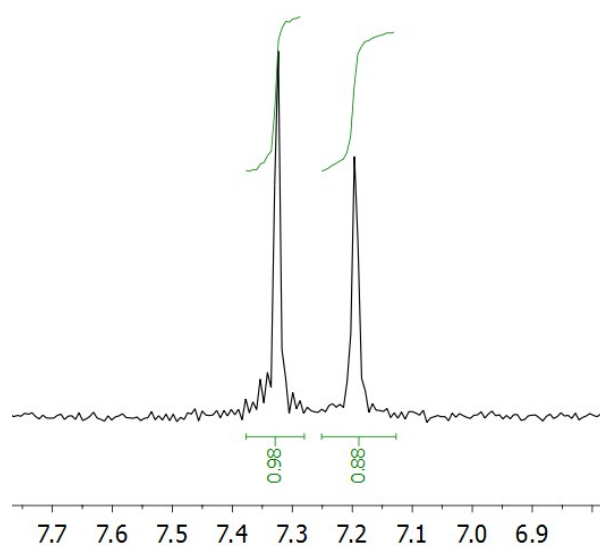

**Figure S10.**  $^{31}\text{P}$  NMR spectrum of the **ABii/ACii** mixture at 1:1 ratio. (162 MHz,  $\text{CDCl}_3$ ).

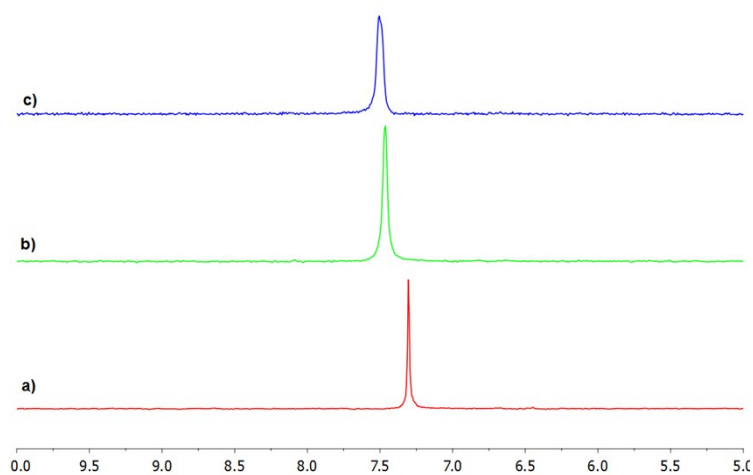

**Figure S11.**  $^{31}\text{P}$  NMR competition experiment with LLA and Ethanol as competitive guest, and ACii as host. (162 MHz,  $\text{CDCl}_3$ ). a) ACii; b) ACii/LLA 1:0.4. c) ACii/LLA/Ethanol 1:0.4:0.4.

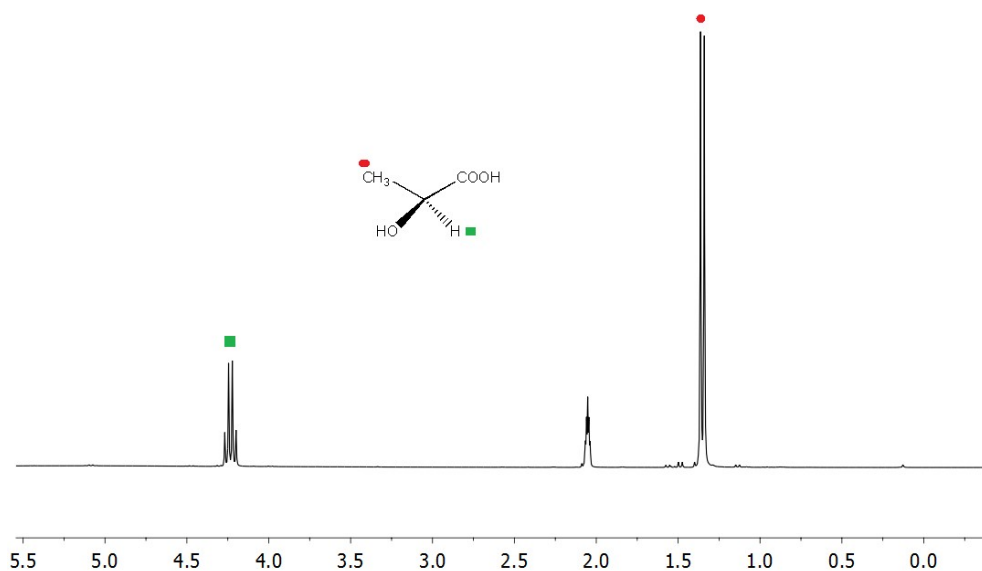

**Figure S12.**  $^1\text{H}$  NMR spectrum of commercial L-lactic acid (300 MHz,  $d_6$ -acetone, 298K)

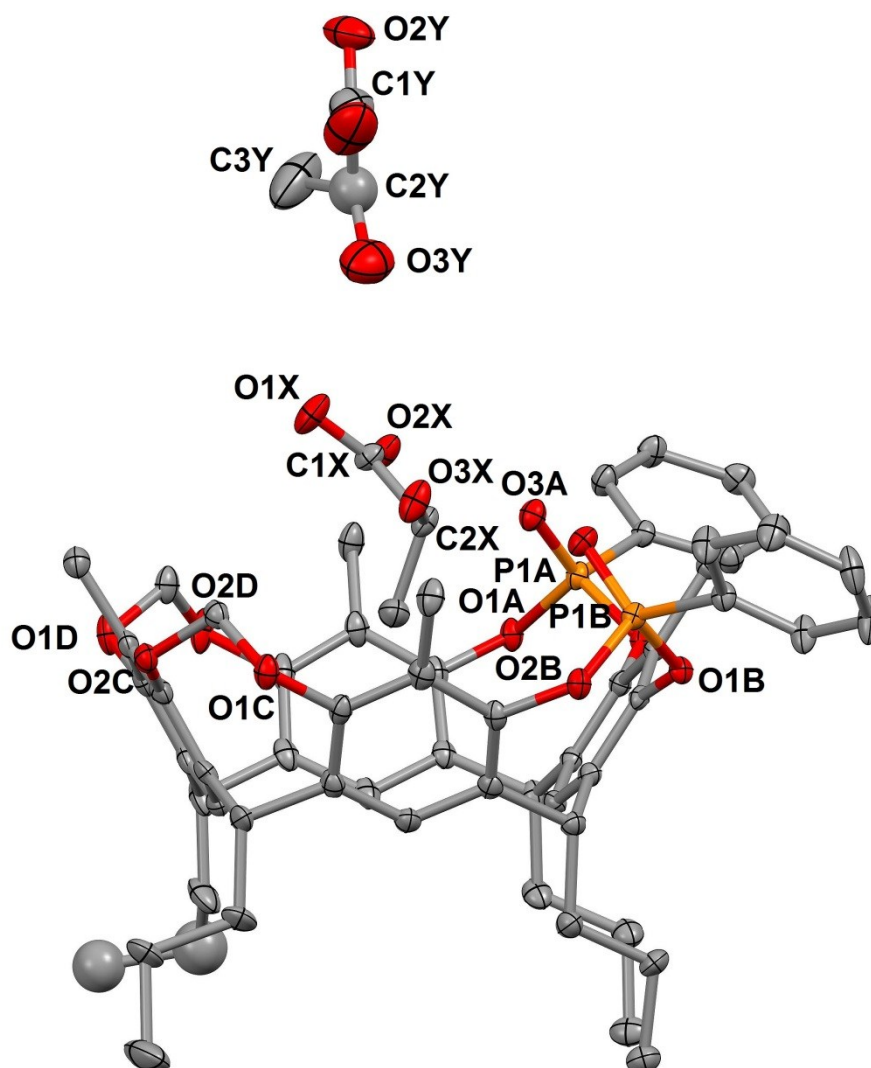

**Figure S13.** Ortep view (20% probability level) with partial labeling scheme of **ABii**[**C<sub>3</sub>H<sub>7</sub>**, **CH<sub>3</sub>**, **Ph**]**•C<sub>3</sub>H<sub>6</sub>O<sub>6</sub>•C<sub>3</sub>H<sub>6</sub>O<sub>6</sub>•C<sub>6</sub>H<sub>14</sub>**. Hydrogen atoms have been omitted for clarity.



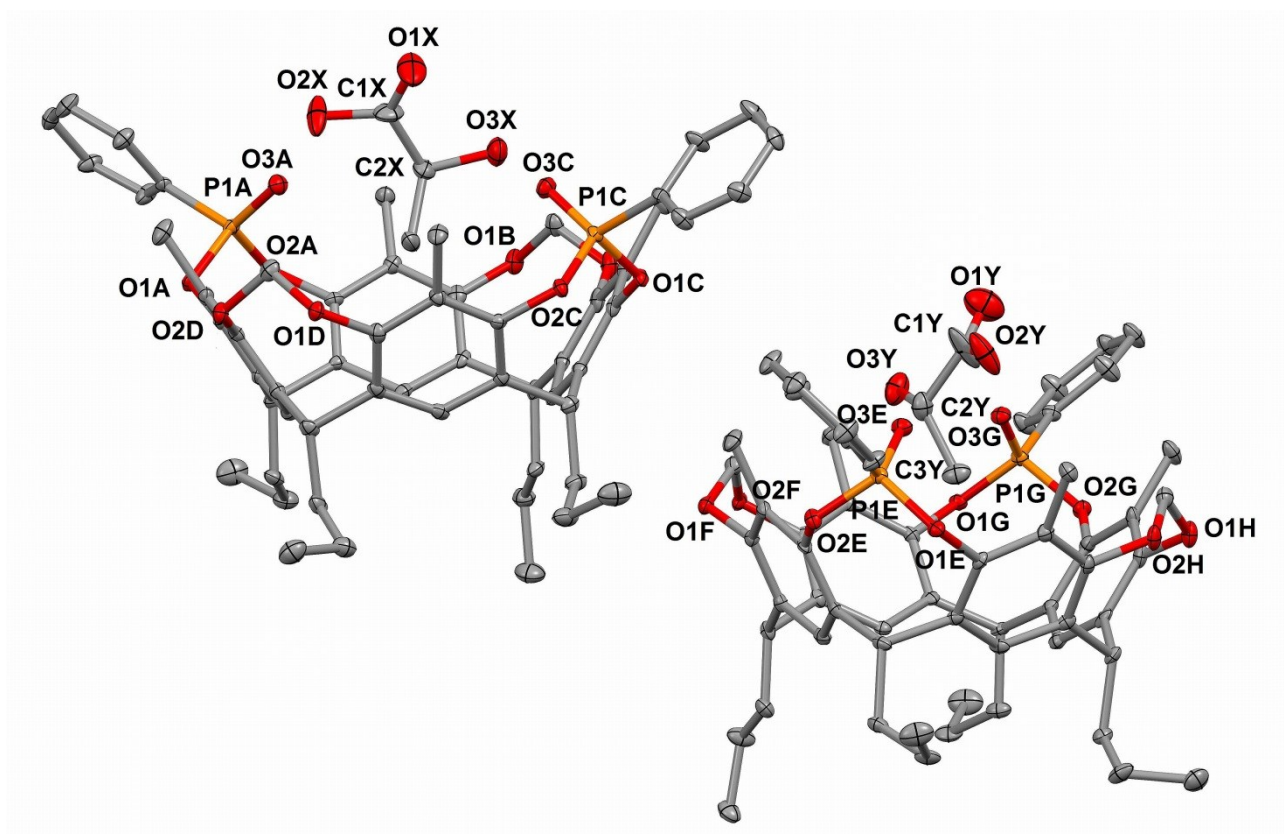

**Figure S14.** Ortep view (20% probability level) with partial labeling scheme of the two independent complexes  $\text{ACii}[\text{C}_3\text{H}_7, \text{CH}_3, \text{Ph}] \cdot \text{C}_3\text{H}_6\text{O}_6$ . Hydrogen atoms have been omitted for clarity.

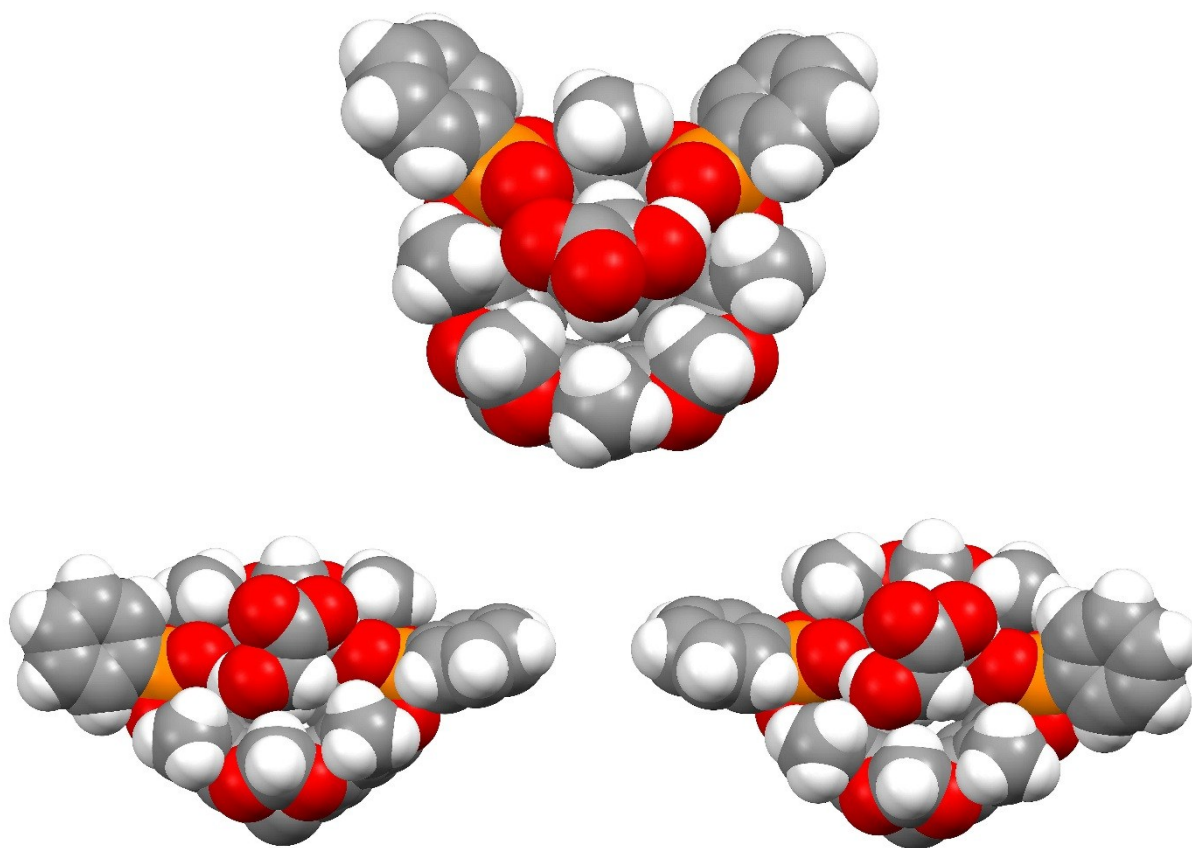

**Figure S15.** Space and filling view of the two complexes **LLA@ABii** (above) and **LLA@ACii** (below, both independent complexes are shown). The alkylic chains at the lower rim have been omitted for clarity. The steric hindrance provided by the frontal methylene bridges is evident for the **ACii** isomer, but it is not present for the **ABii** one.

| ABii                                                                    |          |          |                     | ACii                                                                    |          |          |                     |
|-------------------------------------------------------------------------|----------|----------|---------------------|-------------------------------------------------------------------------|----------|----------|---------------------|
| Preparation of the samples                                              |          |          |                     |                                                                         |          |          |                     |
| [ABii] <sub>0</sub> = 1.71 mM (0.84 mg in 500 μL of CDCl <sub>3</sub> ) |          |          |                     | [ACii] <sub>0</sub> = 1.51 mM (0.74 mg in 500 μL of CDCl <sub>3</sub> ) |          |          |                     |
| [LLA] <sub>0</sub> = 57.4 mM (20.7 mg in 4.0 mL of CDCl <sub>3</sub> )  |          |          |                     | [LLA] <sub>0</sub> = 57.4 mM (20.7 mg in 4.0 mL of CDCl <sub>3</sub> )  |          |          |                     |
| NMR measurements                                                        |          |          |                     |                                                                         |          |          |                     |
| #                                                                       | [ABii]   | [LLA]    | δ( <sup>31</sup> P) | #                                                                       | [ACii]   | [LLA]    | δ( <sup>31</sup> P) |
| 0                                                                       | 1,71E-03 | 0,00E+00 | 7,060               | 0                                                                       | 1,51E-03 | 0,00E+00 | 7,295               |
| 1                                                                       | 1,68E-03 | 1,13E-03 | 7,720               | 1                                                                       | 1,48E-03 | 1,13E-03 | 7,614               |
| 2                                                                       | 1,65E-03 | 2,21E-03 | 8,295               | 2                                                                       | 1,45E-03 | 2,21E-03 | 7,958               |
| 3                                                                       | 1,62E-03 | 3,25E-03 | 8,636               | 3                                                                       | 1,42E-03 | 3,25E-03 | 8,141               |
| 4                                                                       | 1,59E-03 | 4,26E-03 | 8,846               | 4                                                                       | 1,40E-03 | 4,26E-03 | 8,256               |
| 5                                                                       | 1,56E-03 | 5,22E-03 | 8,974               | 5                                                                       | 1,37E-03 | 5,22E-03 | 8,329               |
| 6                                                                       | 1,53E-03 | 6,16E-03 | 9,049               | 6                                                                       | 1,35E-03 | 6,16E-03 | 8,370               |
| 7                                                                       | 1,50E-03 | 7,06E-03 | 9,111               | 7                                                                       | 1,32E-03 | 7,06E-03 | 8,407               |
| 8                                                                       | 1,48E-03 | 7,92E-03 | 9,156               | 8                                                                       | 1,30E-03 | 7,92E-03 | 8,436               |
| 9                                                                       | 1,43E-03 | 9,57E-03 | 9,215               | 9                                                                       | 1,28E-03 | 8,76E-03 | 8,459               |
| 10                                                                      | 1,38E-03 | 1,11E-02 | 9,257               | 10                                                                      | 1,26E-03 | 9,57E-03 | 8,472               |
|                                                                         |          |          |                     | 11                                                                      | 1,24E-03 | 1,04E-02 | 8,491               |
| Association constant determination                                      |          |          |                     |                                                                         |          |          |                     |
| K <sub>a</sub> = 6.74·10 <sup>2</sup> ± 0.065 M <sup>-1</sup>           |          |          |                     | K <sub>a</sub> = 5.37·10 <sup>2</sup> ± 0.065 M <sup>-1</sup>           |          |          |                     |
| R <sup>2</sup> = 0.993                                                  |          |          |                     | R <sup>2</sup> = 0.987                                                  |          |          |                     |

**Table S1.** <sup>31</sup>P NMR titrations data for the determination of association constants.

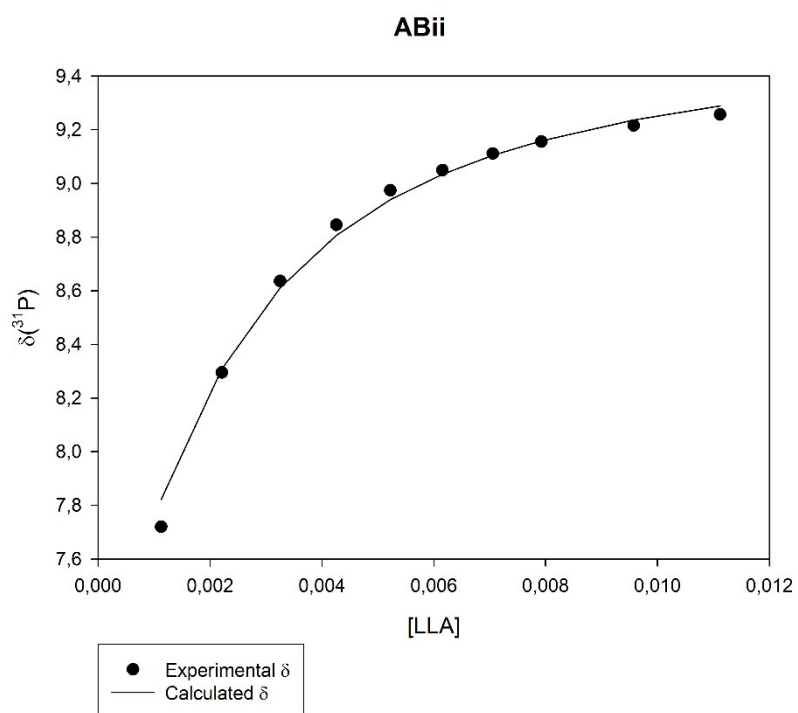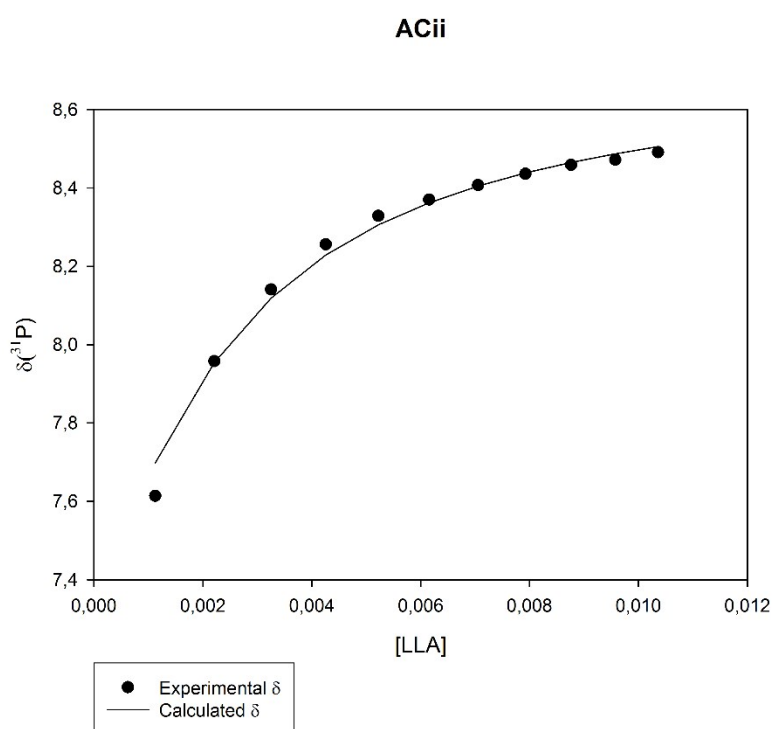

**Figure S16.** Fitting curves of  $^{31}\text{P}$  NMR titrations for **ABii** (top) and **ACii** (bottom).
